# Supplementary material for: A structured catalyst with high dispersity of Au species based on hollow SiC foam with porous walls for acetylene hydrochlorination
Source: Royal Society of Chemistry journal article supplement (doi:10.1039/d1ra02533c), 2021-01-01
Supplement: d1ra02533c1.pdf [file d1ra02533c1.pdf]

**The structured catalyst with high dispersity of Au species based on hollow SiC foam with porous wall for acetylene hydrochlorination**

Peng Wang,<sup>ab</sup> Xiaodan Yang,<sup>b</sup> Ye Zhang,<sup>ab</sup> Yong Gao<sup>b</sup> and Jinsong Zhang<sup>b\*</sup>

<sup>a</sup> School of Materials Science and Engineering, Northeastern University, Shenyang 110819, Liaoning, China

<sup>b</sup> Shenyang National Laboratory for Materials Science, Institute of Metal Research, Chinese Academy of Sciences, Shenyang 110016, Liaoning, China

\* Corresponding author, E-mail address: jszhang@imr.ac.cn (J. Zhang)

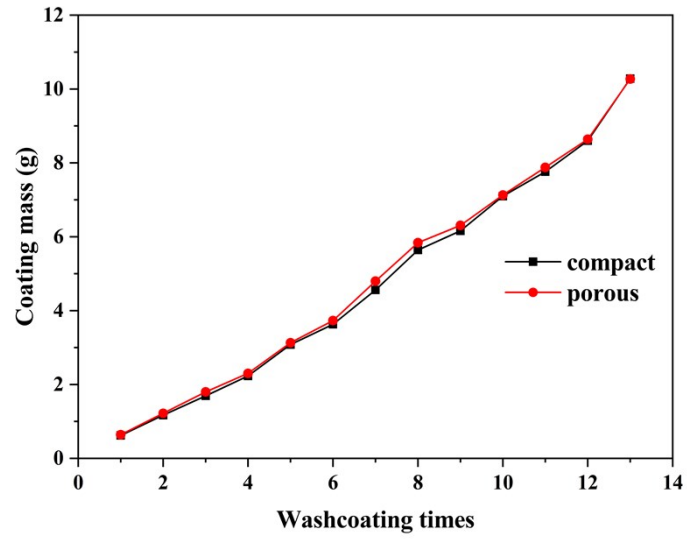

Fig. S1 Relation between coating mass and washcoating times.

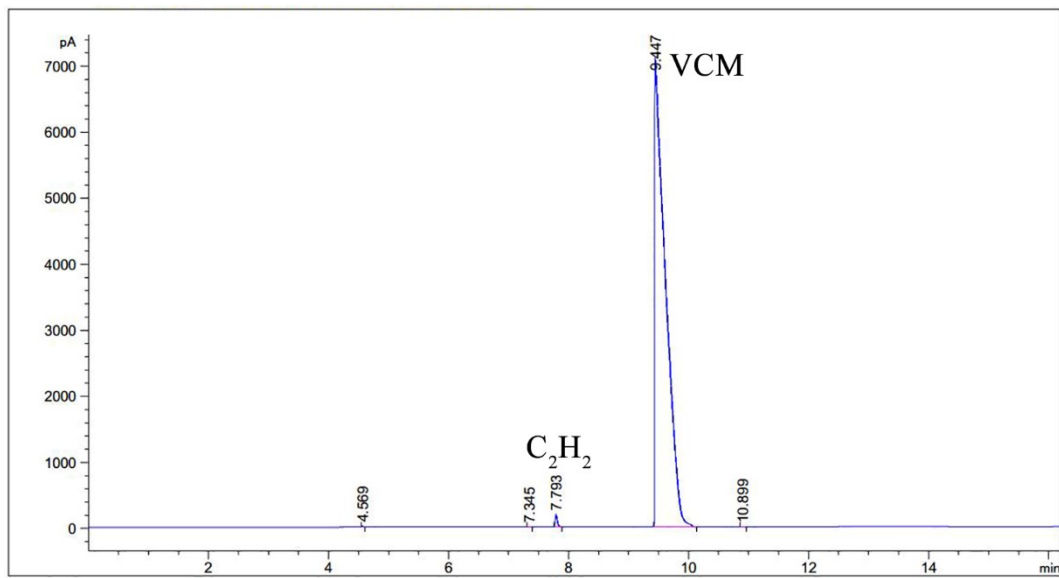

Fig. S2 Gas chromatogram spectrum of the products.

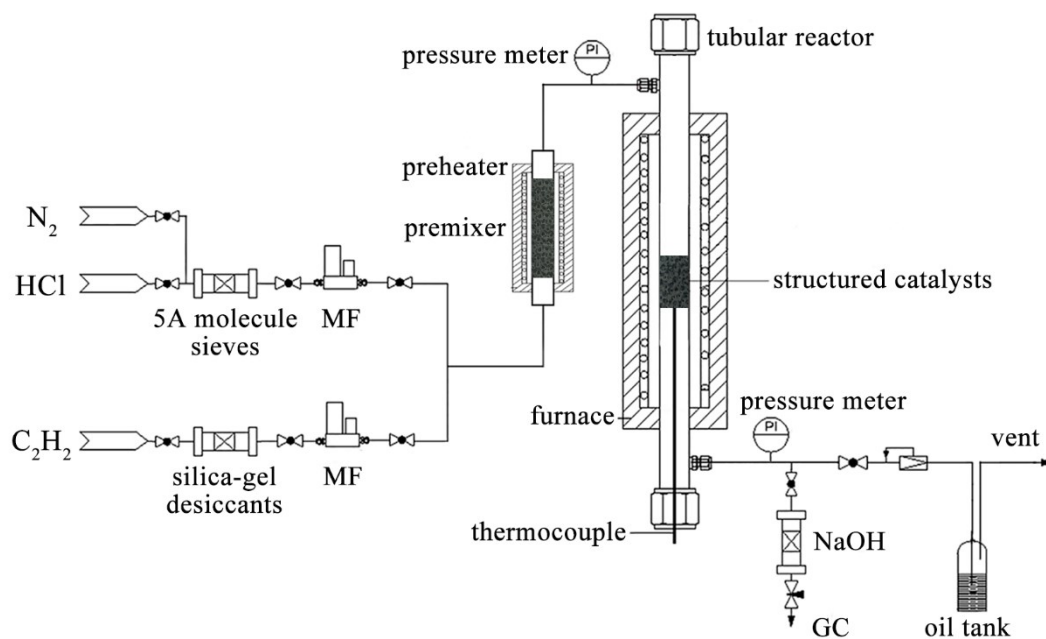

Fig. S3 Schematic diagram of experimental setup.

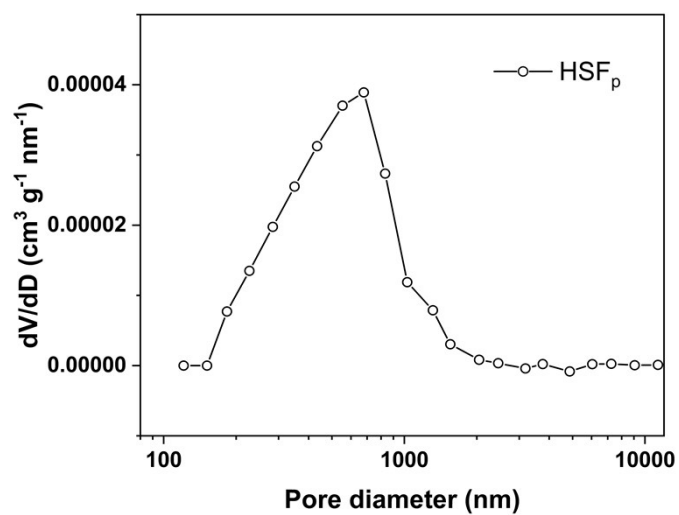

Fig. S4 The pore size distribution of HSF<sub>p</sub> obtained by mercury intrusion porosimetry.

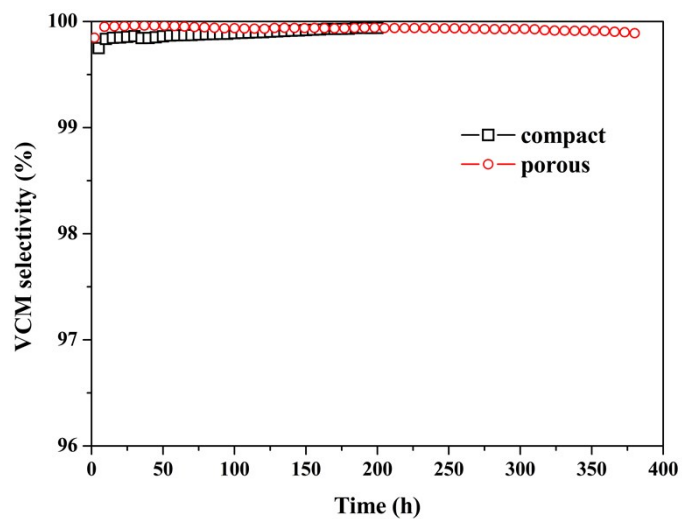

**Fig. S5** VCM selectivity of structured catalysts with different structured support as a function of reaction

time.

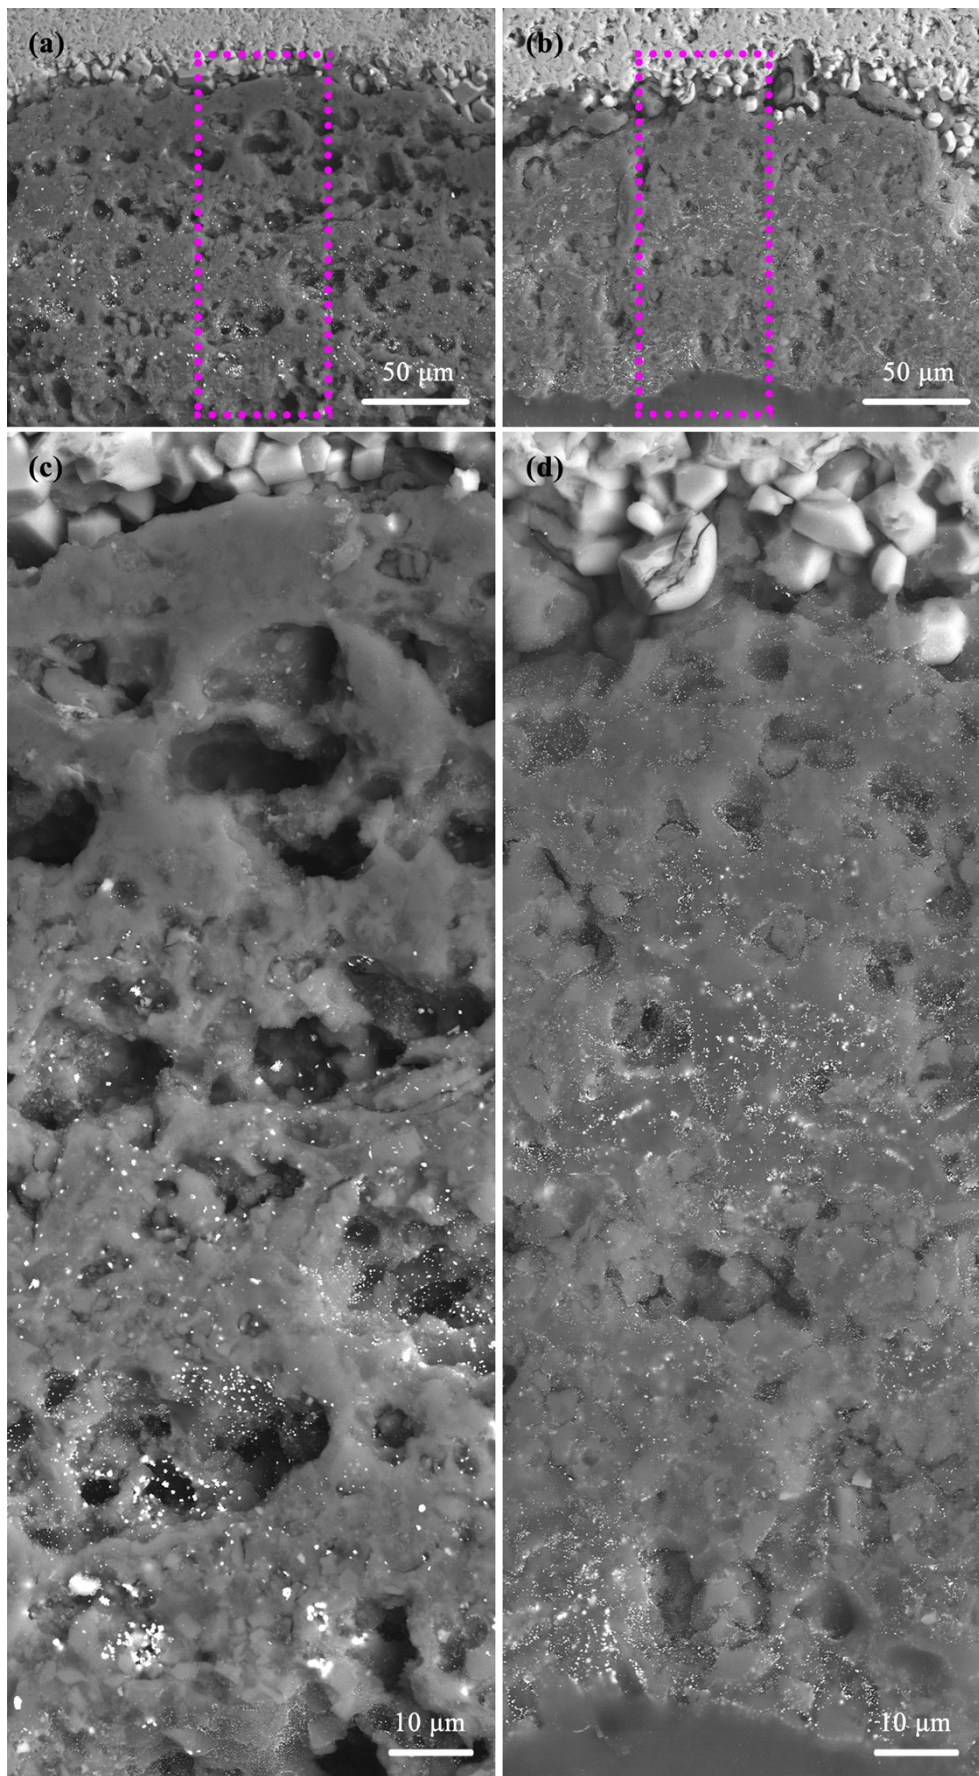

**Fig. S6** BSE images of used Au/AC/SHF. (a) compact, (b) porous and (c, d) magnified of (a, b)



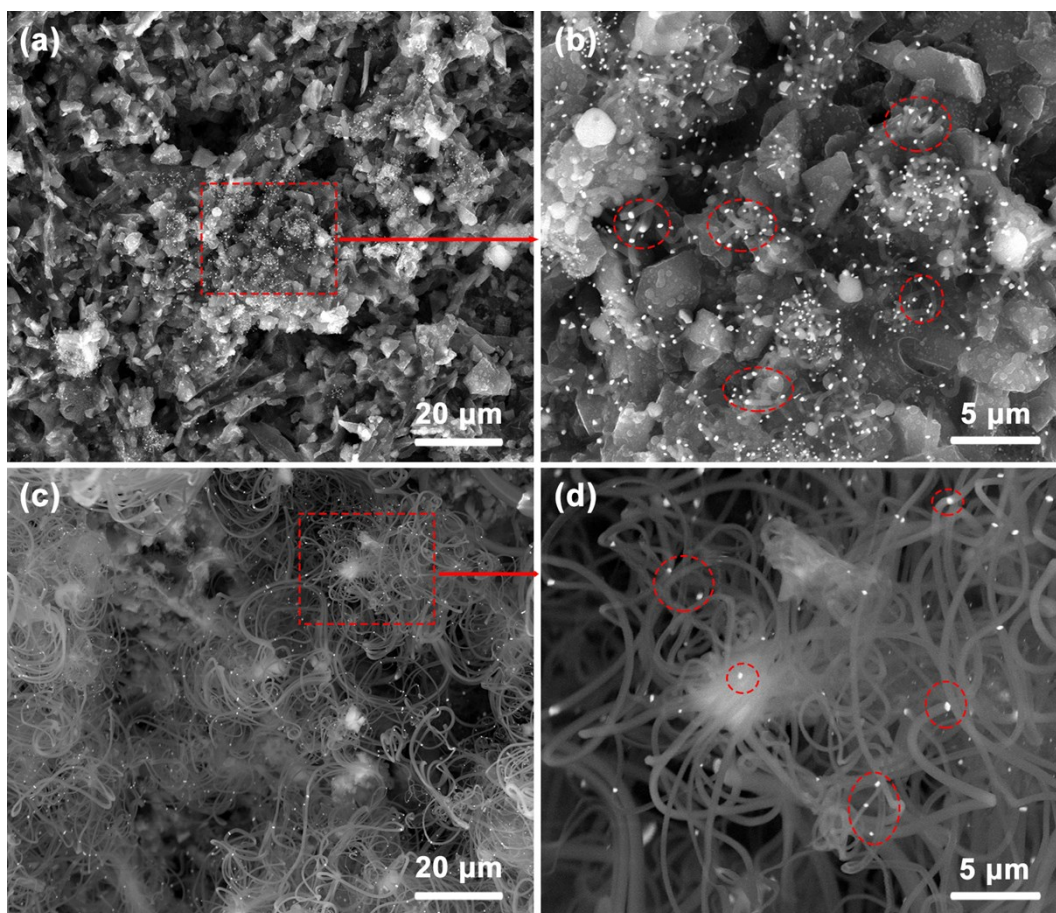

**Fig. S7** SEM images of the surface of used Au/AC/HSF structured catalysts. (a-b) compact and (c-d) porous.

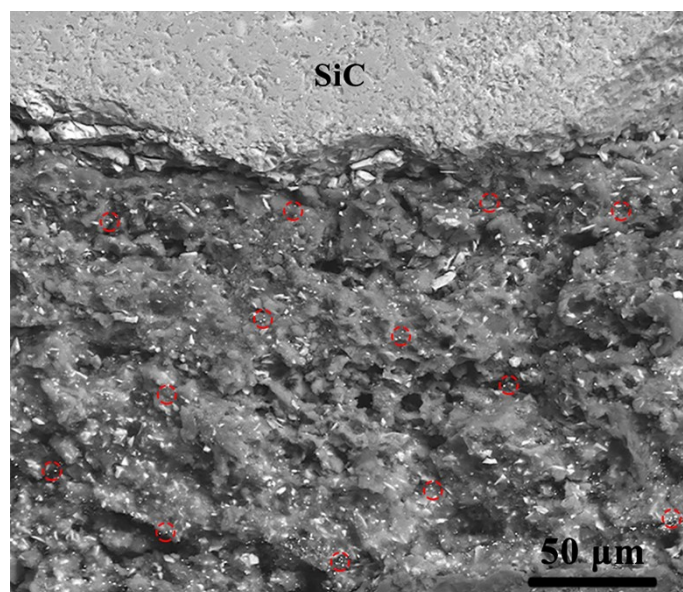

**Fig. S8** BSE image of the cross-section of the used Au/AC/HSF<sub>c</sub> structured catalyst prepared by the freeze-drying method.

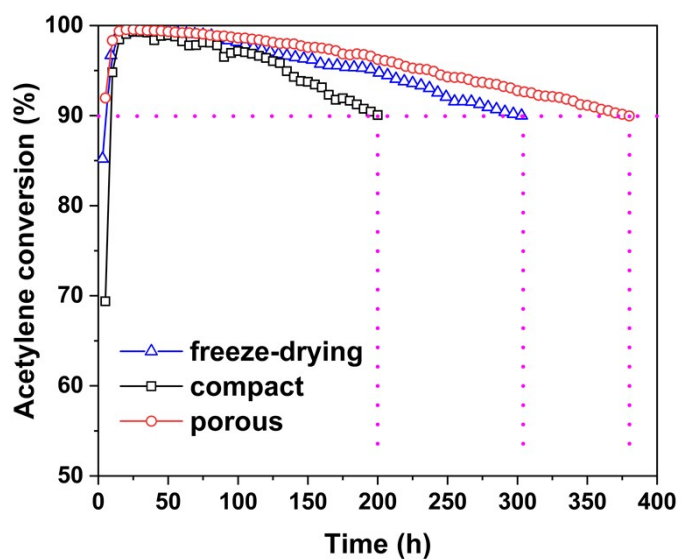

**Fig. S9** Acetylene conversion of different structured catalysts as a function of reaction time. Reaction conditions:  $T = 170\text{ }^{\circ}\text{C}$ ,  $\text{GHSV}(\text{C}_2\text{H}_2) = 130\text{ h}^{-1}$  and  $\text{HCl}/\text{C}_2\text{H}_2 = 1.1$ .
